# Supplementary material
Source: publisher site journal article supplement (https://www.dovepress.com/get_supplementary_file.php?f=387781.xlsx)
Supplement: Supplementary file 1 [file get_supplementary_file.php]

## Sheet: Supplementary Table 1
Supplementary Table 1 Bioinformatics database predicts some miRNAs that may target TP63 mRNA
Bioinformatics databases
ENCORI	miRWalk	TargetSpy
hsa-let-7a-5p	hsa-let-7a-5p	hsa-miR-34c-3p
hsa-let-7b-5p	hsa-let-7b-5p	hsa-miR-369-3p
hsa-let-7c-5p	hsa-let-7c-5p	hsa-miR-520f
hsa-let-7d-5p	hsa-let-7d-5p	hsa-miR-374a
hsa-let-7e-5p	hsa-let-7e-5p	hsa-miR-519a
hsa-let-7f-5p	hsa-miR-17-5p	hsa-miR-545
hsa-miR-19a-3p	hsa-miR-19a-3p	hsa-miR-647
hsa-miR-19b-3p	hsa-miR-19b-1-5p	hsa-miR-518a-5p
hsa-miR-21-5p	hsa-miR-19b-3p	hsa-miR-129-5p
hsa-miR-22-3p	hsa-miR-20a-5p	hsa-miR-527
hsa-miR-23a-3p	hsa-miR-20a-3p	hsa-miR-130b
hsa-miR-27a-3p	hsa-miR-23a-5p	hsa-miR-23a
hsa-miR-28-5p	hsa-miR-23a-3p	hsa-miR-130a
hsa-miR-30a-5p	hsa-miR-24-3p	hsa-miR-501-5p
hsa-miR-33a-5p	hsa-miR-26a-5p	hsa-miR-10b
hsa-miR-98-5p	hsa-miR-26a-1-3p	hsa-miR-483-3p
hsa-miR-101-3p	hsa-miR-26b-5p	hsa-miR-548i
hsa-miR-196a-5p	hsa-miR-27a-5p	hsa-miR-302a
hsa-miR-197-3p	hsa-miR-28-5p	hsa-miR-302b
hsa-miR-129-5p	hsa-miR-30a-5p	hsa-miR-873
hsa-miR-148a-3p	hsa-miR-31-5p	hsa-miR-583
hsa-miR-30c-5p	hsa-miR-31-3p	hsa-miR-548b-5p
hsa-miR-30d-5p	hsa-miR-92a-3p	hsa-miR-382
hsa-miR-139-5p	hsa-miR-99a-3p	hsa-miR-328
hsa-miR-10a-5p	hsa-miR-103a-2-5p	hsa-miR-548d-5p
hsa-miR-10b-5p	hsa-miR-103a-1-5p	hsa-miR-1260
hsa-miR-181a-5p	hsa-miR-105-3p	hsa-miR-127-5p
hsa-miR-181b-5p	hsa-miR-106a-5p	hsa-miR-875-5p
hsa-miR-181c-5p	hsa-miR-192-3p	hsa-miR-582-5p
hsa-miR-183-5p	hsa-miR-196a-5p	hsa-miR-1205
hsa-miR-204-5p	hsa-miR-197-3p	hsa-miR-301b
hsa-miR-211-5p	hsa-miR-198	hsa-miR-301a
hsa-miR-214-3p	hsa-miR-199a-3p	hsa-miR-519b-3p
hsa-miR-216a-5p	hsa-miR-208a-5p	hsa-miR-609
hsa-miR-217	hsa-miR-208a-3p	hsa-miR-520d-5p
hsa-miR-221-3p	hsa-miR-129-1-3p	hsa-miR-23b
hsa-miR-222-3p	hsa-miR-148a-5p	hsa-miR-298
hsa-miR-223-3p	hsa-miR-148a-3p	hsa-miR-543
hsa-miR-224-5p	hsa-miR-30c-2-3p	hsa-miR-302f
hsa-miR-200b-3p	hsa-miR-147a	hsa-miR-494
hsa-let-7g-5p	hsa-miR-196a-3p	hsa-miR-524-5p
hsa-let-7i-5p	hsa-miR-199b-3p	hsa-miR-519b-5p
hsa-miR-23b-3p	hsa-miR-204-5p	hsa-miR-519c-5p
hsa-miR-27b-3p	hsa-miR-205-5p	hsa-miR-518d-5p
hsa-miR-30b-5p	hsa-miR-210-5p	hsa-miR-520c-5p
hsa-miR-122-5p	hsa-miR-211-5p	hsa-miR-526a
hsa-miR-128-3p	hsa-miR-211-3p	hsa-miR-30d
hsa-miR-130a-3p	hsa-miR-218-1-3p	hsa-miR-648
hsa-miR-140-5p	hsa-miR-219a-1-3p	hsa-miR-193a-3p
hsa-miR-141-3p	hsa-miR-221-5p	hsa-miR-497
hsa-miR-143-3p	hsa-miR-222-5p	hsa-miR-561
hsa-miR-144-3p	hsa-miR-224-3p	hsa-miR-548e
hsa-miR-152-3p	hsa-miR-23b-3p	hsa-miR-181d
hsa-miR-9-5p	hsa-miR-27b-3p	hsa-miR-181a
hsa-miR-9-3p	hsa-miR-30b-3p	hsa-miR-922
hsa-miR-136-5p	hsa-miR-122-3p	hsa-miR-221-3p
hsa-miR-149-5p	hsa-miR-124-5p	hsa-miR-181b
hsa-miR-184	hsa-miR-125b-5p	hsa-miR-140-5p
hsa-miR-185-5p	hsa-miR-125b-1-3p	hsa-miR-559
hsa-miR-186-5p	hsa-miR-128-3p	hsa-miR-595
hsa-miR-188-5p	hsa-miR-132-3p	hsa-miR-28-3p
hsa-miR-320a	hsa-miR-140-5p	hsa-miR-668
hsa-miR-200c-3p	hsa-miR-140-3p	hsa-miR-935
hsa-miR-200a-3p	hsa-miR-142-3p	hsa-miR-548b-3p
hsa-miR-302a-3p	hsa-miR-143-3p	hsa-miR-320b
hsa-miR-299-3p	hsa-miR-144-5p	hsa-miR-320c
hsa-miR-301a-3p	hsa-miR-152-3p	hsa-miR-320a
hsa-miR-130b-3p	hsa-miR-153-5p	hsa-miR-498
hsa-miR-30e-5p	hsa-miR-191-5p	hsa-miR-629
hsa-miR-362-5p	hsa-miR-125a-5p	hsa-miR-200a
hsa-miR-365a-3p	hsa-miR-125a-3p	hsa-miR-26a
hsa-miR-302b-3p	hsa-miR-127-5p	hsa-miR-508-3p
hsa-miR-302c-3p	hsa-miR-129-2-3p	hsa-miR-204
hsa-miR-302d-3p	hsa-miR-134-5p	hsa-miR-211
hsa-miR-369-3p	hsa-miR-134-3p	hsa-miR-628-3p
hsa-miR-371a-3p	hsa-miR-136-3p	hsa-miR-519c-3p
hsa-miR-372-3p	hsa-miR-138-1-3p	hsa-miR-101
hsa-miR-373-3p	hsa-miR-146a-3p	hsa-miR-548k
hsa-miR-377-3p	hsa-miR-149-3p	hsa-miR-10a
hsa-miR-381-3p	hsa-miR-154-5p	hsa-miR-203
hsa-miR-330-3p	hsa-miR-184	hsa-miR-548c-5p
hsa-miR-342-3p	hsa-miR-186-3p	hsa-miR-548a-5p
hsa-miR-337-3p	hsa-miR-188-5p	hsa-miR-548j
hsa-miR-323a-3p	hsa-miR-188-3p	hsa-miR-181c
hsa-miR-151a-3p	hsa-miR-194-5p	hsa-miR-302c
hsa-miR-148b-3p	hsa-miR-320a-5p	hsa-miR-139-5p
hsa-miR-335-5p	hsa-miR-320a-3p	hsa-miR-1243
hsa-miR-196b-5p	hsa-miR-200c-5p	hsa-miR-515-5p
hsa-miR-429	hsa-miR-106b-5p	hsa-miR-320d
hsa-miR-410-3p	hsa-miR-30c-1-3p	hsa-miR-384
hsa-miR-483-3p	hsa-miR-34c-5p	hsa-miR-548c-3p
hsa-miR-485-3p	hsa-miR-299-5p	hsa-miR-30e
hsa-miR-491-5p	hsa-miR-301a-3p	hsa-miR-607
hsa-miR-493-5p	hsa-miR-99b-3p	hsa-miR-21
hsa-miR-495-3p	hsa-miR-296-5p	hsa-miR-575
hsa-miR-496	hsa-miR-130b-3p	hsa-miR-1208
hsa-miR-181d-5p	hsa-miR-30e-5p	hsa-miR-548f
hsa-miR-512-3p	hsa-miR-362-5p	hsa-miR-656
hsa-miR-498	hsa-miR-365a-5p	hsa-miR-371-5p
hsa-miR-520e	hsa-miR-365a-3p	hsa-miR-1276
hsa-miR-520f-3p	hsa-miR-365b-5p	hsa-miR-338-5p
hsa-miR-519c-5p	hsa-miR-365b-3p	hsa-miR-495
hsa-miR-519c-3p	hsa-miR-371a-5p	hsa-miR-136
hsa-miR-520a-3p	hsa-miR-372-5p	hsa-miR-22
hsa-miR-519b-3p	hsa-miR-373-3p	hsa-miR-548h
hsa-miR-520b	hsa-miR-375-5p	hsa-miR-188-3p
hsa-miR-526a	hsa-miR-376a-3p	hsa-miR-1299
hsa-miR-520c-3p	hsa-miR-378a-3p	hsa-miR-522
hsa-miR-524-5p	hsa-miR-383-5p	hsa-miR-1303
hsa-miR-520d-5p	hsa-miR-383-3p	hsa-miR-223
hsa-miR-520d-3p	hsa-miR-330-3p	hsa-miR-1202
hsa-miR-520g-3p	hsa-miR-328-5p	hsa-miR-337-3p
hsa-miR-520h	hsa-miR-328-3p	hsa-miR-30b
hsa-miR-522-3p	hsa-miR-337-3p	hsa-miR-580
hsa-miR-519a-3p	hsa-miR-326	hsa-miR-940
hsa-miR-503-5p	hsa-miR-151a-5p	hsa-miR-1274a
hsa-miR-513a-5p	hsa-miR-151a-3p	hsa-miR-514
hsa-miR-299-5p	hsa-miR-135b-3p	hsa-miR-608
hsa-miR-545-3p	hsa-miR-338-5p	hsa-miR-455-3p
hsa-miR-579-3p	hsa-miR-339-5p	hsa-miR-17
hsa-miR-580-3p	hsa-miR-339-3p	hsa-miR-30a-5p
hsa-miR-582-5p	hsa-miR-335-3p	hsa-miR-132
hsa-miR-590-5p	hsa-miR-325	hsa-miR-511
hsa-miR-33b-5p	hsa-miR-345-5p	hsa-miR-1304
hsa-miR-654-5p	hsa-miR-345-3p	hsa-miR-1274b
hsa-miR-671-5p	hsa-miR-422a	hsa-miR-1297
hsa-miR-668-3p	hsa-miR-423-5p	hsa-miR-93
hsa-miR-454-3p	hsa-miR-424-3p	hsa-miR-637
hsa-miR-770-5p	hsa-miR-18b-3p	hsa-miR-423-5p
hsa-miR-28-3p	hsa-miR-20b-5p	hsa-miR-26b
hsa-miR-130a-5p	hsa-miR-450a-1-3p	hsa-miR-135b
hsa-miR-361-3p	hsa-miR-433-5p	hsa-miR-491-3p
hsa-miR-371a-5p	hsa-miR-329-5p	hsa-miR-144
hsa-miR-340-5p	hsa-miR-409-3p	hsa-miR-520h
hsa-miR-488-3p	hsa-miR-412-3p	hsa-miR-578
hsa-miR-556-3p	hsa-miR-410-5p	hsa-miR-20b
hsa-miR-582-3p	hsa-miR-483-5p	hsa-miR-198
hsa-miR-616-3p	hsa-miR-483-3p	hsa-miR-501-3p
hsa-miR-629-5p	hsa-miR-484	hsa-miR-562
hsa-miR-654-3p	hsa-miR-485-5p	hsa-miR-520g
hsa-miR-671-3p	hsa-miR-486-5p	hsa-miR-641
hsa-miR-300	hsa-miR-488-3p	hsa-miR-584
hsa-miR-450b-5p	hsa-miR-491-5p	hsa-miR-1827
hsa-miR-888-5p	hsa-miR-511-5p	hsa-miR-431
hsa-miR-889-3p	hsa-miR-492
hsa-miR-708-5p	hsa-miR-493-5p
hsa-miR-885-5p	hsa-miR-493-3p
hsa-miR-873-5p	hsa-miR-432-5p
hsa-miR-543	hsa-miR-193b-3p
hsa-miR-301b-3p	hsa-miR-512-3p
hsa-miR-216b-5p	hsa-miR-515-5p
hsa-miR-942-5p	hsa-miR-519e-3p
hsa-miR-944	hsa-miR-520f-5p
hsa-miR-519b-5p	hsa-miR-520f-3p
hsa-miR-520c-5p	hsa-miR-519c-3p
hsa-miR-518d-5p	hsa-miR-520a-3p
hsa-miR-1224-5p	hsa-miR-526b-5p
hsa-miR-320b	hsa-miR-525-3p
hsa-miR-320c	hsa-miR-518f-5p
hsa-miR-1323	hsa-miR-520b-5p
hsa-miR-1301-3p	hsa-miR-518b
hsa-miR-1298-5p	hsa-miR-520c-3p
hsa-miR-1179	hsa-miR-518c-5p
hsa-miR-1251-5p	hsa-miR-517a-3p
hsa-miR-548o-3p	hsa-miR-519d-3p
hsa-miR-302e	hsa-miR-521
hsa-miR-1252-5p	hsa-miR-520d-5p
hsa-miR-1321	hsa-miR-520d-3p
hsa-miR-320d	hsa-miR-517b-3p
hsa-miR-224-3p	hsa-miR-520g-3p
hsa-miR-2115-3p	hsa-miR-517c-3p
hsa-miR-3139	hsa-miR-522-3p
hsa-miR-3163	hsa-miR-519a-3p
hsa-miR-3179	hsa-miR-519a-2-5p
hsa-miR-4295	hsa-miR-499a-3p
hsa-miR-4306	hsa-miR-501-5p
hsa-miR-23c	hsa-miR-502-5p
hsa-miR-3666	hsa-miR-504-5p
hsa-miR-3150b-3p	hsa-miR-505-5p
hsa-miR-4428	hsa-miR-513a-3p
hsa-miR-4644	hsa-miR-506-3p
hsa-miR-3064-5p	hsa-miR-508-5p
hsa-miR-4739	hsa-miR-509-5p
hsa-miR-4756-5p	hsa-miR-509-3p
hsa-miR-4766-5p	hsa-miR-510-5p
hsa-miR-4784	hsa-miR-514a-5p
hsa-miR-5047	hsa-miR-532-3p
hsa-miR-664b-3p	hsa-miR-455-3p
hsa-miR-561-5p	hsa-miR-487b-5p
hsa-miR-1277-5p	hsa-miR-552-5p
hsa-miR-365b-3p	hsa-miR-92b-5p
hsa-miR-6504-5p	hsa-miR-556-5p
hsa-miR-6509-5p	hsa-miR-568
	hsa-miR-571
	hsa-miR-572
	hsa-miR-574-5p
	hsa-miR-574-3p
	hsa-miR-576-3p
	hsa-miR-579-5p
	hsa-miR-583
	hsa-miR-585-3p
	hsa-miR-550a-5p
	hsa-miR-591
	hsa-miR-593-5p
	hsa-miR-597-5p
	hsa-miR-597-3p
	hsa-miR-598-3p
	hsa-miR-616-5p
	hsa-miR-617
	hsa-miR-618
	hsa-miR-619-5p
	hsa-miR-621
	hsa-miR-624-3p
	hsa-miR-625-3p
	hsa-miR-627-5p
	hsa-miR-627-3p
	hsa-miR-628-3p
	hsa-miR-629-5p
	hsa-miR-629-3p
	hsa-miR-33b-3p
	hsa-miR-634
	hsa-miR-636
	hsa-miR-639
	hsa-miR-641
	hsa-miR-642a-5p
	hsa-miR-642a-3p
	hsa-miR-646
	hsa-miR-652-5p
	hsa-miR-662
	hsa-miR-449b-5p
	hsa-miR-449b-3p
	hsa-miR-654-5p
	hsa-miR-656-5p
	hsa-miR-659-5p
	hsa-miR-542-5p
	hsa-miR-758-5p
	hsa-miR-758-3p
	hsa-miR-671-5p
	hsa-miR-668-3p
	hsa-miR-550a-3-5p
	hsa-miR-767-3p
	hsa-miR-1224-5p
	hsa-miR-1224-3p
	hsa-miR-151b
	hsa-miR-320b
	hsa-miR-320c
	hsa-miR-1296-5p
	hsa-miR-1296-3p
	hsa-miR-1468-3p
	hsa-miR-1271-3p
	hsa-miR-454-5p
	hsa-miR-454-3p
	hsa-miR-1185-2-3p
	hsa-miR-449c-5p
	hsa-miR-769-3p
	hsa-miR-766-5p
	hsa-miR-766-3p
	hsa-miR-378d
	hsa-miR-1185-1-3p
	hsa-miR-761
	hsa-miR-765
	hsa-miR-770-5p
	hsa-miR-675-3p
	hsa-miR-874-3p
	hsa-miR-891b
	hsa-miR-875-3p
	hsa-miR-876-5p
	hsa-miR-708-5p
	hsa-miR-190b-5p
	hsa-miR-744-5p
	hsa-miR-877-5p
	hsa-miR-877-3p
	hsa-miR-887-5p
	hsa-miR-665
	hsa-miR-873-5p
	hsa-miR-760
	hsa-miR-301b-5p
	hsa-miR-301b-3p
	hsa-miR-216b-5p
	hsa-miR-216b-3p
	hsa-miR-920
	hsa-miR-922
	hsa-miR-933
	hsa-miR-936
	hsa-miR-938
	hsa-miR-939-3p
	hsa-miR-941
	hsa-miR-297
	hsa-miR-1178-3p
	hsa-miR-1180-5p
	hsa-miR-1181
	hsa-miR-1182
	hsa-miR-1225-3p
	hsa-miR-1227-3p
	hsa-miR-1228-3p
	hsa-miR-1229-5p
	hsa-miR-1229-3p
	hsa-miR-1233-5p
	hsa-miR-1234-3p
	hsa-miR-1236-5p
	hsa-miR-1237-3p
	hsa-miR-1200
	hsa-miR-1202
	hsa-miR-1204
	hsa-miR-1207-3p
	hsa-miR-1208
	hsa-miR-1286
	hsa-miR-1287-3p
	hsa-miR-1293
	hsa-miR-1304-5p
	hsa-miR-1249-5p
	hsa-miR-1249-3p
	hsa-miR-1251-5p
	hsa-miR-1251-3p
	hsa-miR-1257
	hsa-miR-1258
	hsa-miR-1261
	hsa-miR-1262
	hsa-miR-1263
	hsa-miR-548o-3p
	hsa-miR-1266-3p
	hsa-miR-1270
	hsa-miR-1272
	hsa-miR-1275
	hsa-miR-1281
	hsa-miR-1292-5p
	hsa-miR-664a-3p
	hsa-miR-1306-5p
	hsa-miR-1306-3p
	hsa-miR-1307-3p
	hsa-miR-513c-3p
	hsa-miR-1321
	hsa-miR-1324
	hsa-miR-1470
	hsa-miR-1825
	hsa-miR-1908-3p
	hsa-miR-1910-5p
	hsa-miR-1911-5p
	hsa-miR-1913
	hsa-miR-1914-5p
	hsa-miR-1915-5p
	hsa-miR-1972
	hsa-miR-1976
	hsa-miR-2114-3p
	hsa-miR-2116-5p
	hsa-miR-2116-3p
	hsa-miR-2117
	hsa-miR-2278
	hsa-miR-711
	hsa-miR-3116
	hsa-miR-3121-5p
	hsa-miR-3122
	hsa-miR-3124-5p
	hsa-miR-3124-3p
	hsa-miR-3125
	hsa-miR-3126-5p
	hsa-miR-3126-3p
	hsa-miR-3127-5p
	hsa-miR-3130-3p
	hsa-miR-3132
	hsa-miR-3136-5p
	hsa-miR-3138
	hsa-miR-3139
	hsa-miR-3140-3p
	hsa-miR-3142
	hsa-miR-3146
	hsa-miR-548v
	hsa-miR-3151-3p
	hsa-miR-3153
	hsa-miR-3154
	hsa-miR-3156-5p
	hsa-miR-3156-3p
	hsa-miR-3157-5p
	hsa-miR-3157-3p
	hsa-miR-3160-5p
	hsa-miR-3160-3p
	hsa-miR-3162-5p
	hsa-miR-3162-3p
	hsa-miR-3164
	hsa-miR-3166
	hsa-miR-3171
	hsa-miR-3173-3p
	hsa-miR-323b-5p
	hsa-miR-3177-5p
	hsa-miR-3181
	hsa-miR-3184-3p
	hsa-miR-3187-3p
	hsa-miR-320e
	hsa-miR-3190-3p
	hsa-miR-3194-5p
	hsa-miR-3197
	hsa-miR-3198
	hsa-miR-3199
	hsa-miR-3200-5p
	hsa-miR-3200-3p
	hsa-miR-514b-5p
	hsa-miR-514b-3p
	hsa-miR-3202
	hsa-miR-378c
	hsa-miR-4301
	hsa-miR-4298
	hsa-miR-4300
	hsa-miR-4303
	hsa-miR-4306
	hsa-miR-4309
	hsa-miR-4312
	hsa-miR-4313
	hsa-miR-4314
	hsa-miR-4319
	hsa-miR-4320
	hsa-miR-4324
	hsa-miR-4327
	hsa-miR-2355-3p
	hsa-miR-4269
	hsa-miR-4263
	hsa-miR-4270
	hsa-miR-4275
	hsa-miR-4274
	hsa-miR-4277
	hsa-miR-4279
	hsa-miR-4278
	hsa-miR-4280
	hsa-miR-4285
	hsa-miR-4286
	hsa-miR-4289
	hsa-miR-4290
	hsa-miR-4328
	hsa-miR-3610
	hsa-miR-3614-5p
	hsa-miR-3620-3p
	hsa-miR-3622a-5p
	hsa-miR-3622a-3p
	hsa-miR-3622b-5p
	hsa-miR-3648
	hsa-miR-3649
	hsa-miR-3650
	hsa-miR-3654
	hsa-miR-3659
	hsa-miR-3661
	hsa-miR-3664-3p
	hsa-miR-3665
	hsa-miR-3667-5p
	hsa-miR-3667-3p
	hsa-miR-3675-3p
	hsa-miR-3679-3p
	hsa-miR-3680-5p
	hsa-miR-3680-3p
	hsa-miR-3681-5p
	hsa-miR-3682-5p
	hsa-miR-3682-3p
	hsa-miR-3685
	hsa-miR-3690
	hsa-miR-3691-5p
	hsa-miR-3713
	hsa-miR-3714
	hsa-miR-3180
	hsa-miR-3914
	hsa-miR-3917
	hsa-miR-3919
	hsa-miR-3150b-5p
	hsa-miR-3922-5p
	hsa-miR-3928-3p
	hsa-miR-3929
	hsa-miR-3936
	hsa-miR-3940-3p
	hsa-miR-3942-5p
	hsa-miR-3944-5p
	hsa-miR-3945
	hsa-miR-550b-2-5p
	hsa-miR-378e
	hsa-miR-378f
	hsa-miR-4420
	hsa-miR-4422
	hsa-miR-4423-5p
	hsa-miR-378g
	hsa-miR-4427
	hsa-miR-4428
	hsa-miR-4430
	hsa-miR-4432
	hsa-miR-4433a-5p
	hsa-miR-4435
	hsa-miR-4440
	hsa-miR-4442
	hsa-miR-4446-5p
	hsa-miR-4446-3p
	hsa-miR-548ah-3p
	hsa-miR-4452
	hsa-miR-4457
	hsa-miR-4467
	hsa-miR-4473
	hsa-miR-4474-3p
	hsa-miR-4475
	hsa-miR-4476
	hsa-miR-4478
	hsa-miR-3689d
	hsa-miR-4482-5p
	hsa-miR-4484
	hsa-miR-4485-5p
	hsa-miR-4485-3p
	hsa-miR-4486
	hsa-miR-4487
	hsa-miR-4493
	hsa-miR-4495
	hsa-miR-4498
	hsa-miR-4499
	hsa-miR-4506
	hsa-miR-4510
	hsa-miR-4513
	hsa-miR-4514
	hsa-miR-4515
	hsa-miR-4516
	hsa-miR-4521
	hsa-miR-1269b
	hsa-miR-4522
	hsa-miR-4524a-5p
	hsa-miR-4526
	hsa-miR-4529-5p
	hsa-miR-4529-3p
	hsa-miR-4530
	hsa-miR-4531
	hsa-miR-4534
	hsa-miR-378i
	hsa-miR-4537
	hsa-miR-4539
	hsa-miR-3960
	hsa-miR-3972
	hsa-miR-3976
	hsa-miR-4632-3p
	hsa-miR-4633-5p
	hsa-miR-4633-3p
	hsa-miR-4636
	hsa-miR-4640-5p
	hsa-miR-4641
	hsa-miR-4644
	hsa-miR-4645-3p
	hsa-miR-4646-5p
	hsa-miR-4646-3p
	hsa-miR-4648
	hsa-miR-4649-5p
	hsa-miR-4649-3p
	hsa-miR-4650-5p
	hsa-miR-4652-3p
	hsa-miR-4653-3p
	hsa-miR-4656
	hsa-miR-4658
	hsa-miR-4661-5p
	hsa-miR-4661-3p
	hsa-miR-4659b-3p
	hsa-miR-4663
	hsa-miR-4667-5p
	hsa-miR-4667-3p
	hsa-miR-219b-3p
	hsa-miR-4670-3p
	hsa-miR-4672
	hsa-miR-4673
	hsa-miR-4681
	hsa-miR-4683
	hsa-miR-4685-3p
	hsa-miR-4687-5p
	hsa-miR-4687-3p
	hsa-miR-1343-5p
	hsa-miR-4688
	hsa-miR-4690-3p
	hsa-miR-4691-3p
	hsa-miR-4695-5p
	hsa-miR-4697-5p
	hsa-miR-4697-3p
	hsa-miR-4698
	hsa-miR-4700-3p
	hsa-miR-4707-3p
	hsa-miR-4708-5p
	hsa-miR-4709-3p
	hsa-miR-4711-5p
	hsa-miR-4713-3p
	hsa-miR-4715-3p
	hsa-miR-4716-5p
	hsa-miR-4716-3p
	hsa-miR-4717-5p
	hsa-miR-4722-5p
	hsa-miR-4723-5p
	hsa-miR-4723-3p
	hsa-miR-4725-5p
	hsa-miR-4727-3p
	hsa-miR-4728-5p
	hsa-miR-4730
	hsa-miR-4731-5p
	hsa-miR-4732-5p
	hsa-miR-4732-3p
	hsa-miR-4733-5p
	hsa-miR-4733-3p
	hsa-miR-4736
	hsa-miR-3064-5p
	hsa-miR-4739
	hsa-miR-4741
	hsa-miR-4742-5p
	hsa-miR-4742-3p
	hsa-miR-122b-5p
	hsa-miR-122b-3p
	hsa-miR-4748
	hsa-miR-4749-5p
	hsa-miR-4749-3p
	hsa-miR-4750-3p
	hsa-miR-4751
	hsa-miR-4753-3p
	hsa-miR-371b-5p
	hsa-miR-371b-3p
	hsa-miR-4755-5p
	hsa-miR-4756-5p
	hsa-miR-4758-3p
	hsa-miR-4759
	hsa-miR-4761-5p
	hsa-miR-4763-5p
	hsa-miR-4764-5p
	hsa-miR-4769-3p
	hsa-miR-4776-3p
	hsa-miR-4778-3p
	hsa-miR-4779
	hsa-miR-4780
	hsa-miR-4436b-5p
	hsa-miR-4436b-3p
	hsa-miR-4781-5p
	hsa-miR-4786-5p
	hsa-miR-4788
	hsa-miR-4793-3p
	hsa-miR-4794
	hsa-miR-4800-5p
	hsa-miR-4801
	hsa-miR-4802-5p
	hsa-miR-4804-3p
	hsa-miR-5002-5p
	hsa-miR-5002-3p
	hsa-miR-5004-3p
	hsa-miR-5006-5p
	hsa-miR-5006-3p
	hsa-miR-5007-5p
	hsa-miR-5008-5p
	hsa-miR-5008-3p
	hsa-miR-5010-5p
	hsa-miR-5010-3p
	hsa-miR-5011-3p
	hsa-miR-5047
	hsa-miR-5087
	hsa-miR-5089-3p
	hsa-miR-5092
	hsa-miR-5187-5p
	hsa-miR-5190
	hsa-miR-5191
	hsa-miR-5194
	hsa-miR-5195-5p
	hsa-miR-5196-5p
	hsa-miR-5196-3p
	hsa-miR-5571-5p
	hsa-miR-5571-3p
	hsa-miR-5572
	hsa-miR-5579-5p
	hsa-miR-5579-3p
	hsa-miR-664b-5p
	hsa-miR-664b-3p
	hsa-miR-5581-5p
	hsa-miR-5581-3p
	hsa-miR-548at-5p
	hsa-miR-5584-5p
	hsa-miR-5584-3p
	hsa-miR-5585-3p
	hsa-miR-5586-5p
	hsa-miR-5586-3p
	hsa-miR-548au-3p
	hsa-miR-5588-3p
	hsa-miR-5591-5p
	hsa-miR-548aw
	hsa-miR-548ax
	hsa-miR-5691
	hsa-miR-5693
	hsa-miR-5699-5p
	hsa-miR-5704
	hsa-miR-5705
	hsa-miR-5708
	hsa-miR-6069
	hsa-miR-6079
	hsa-miR-6081
	hsa-miR-6085
	hsa-miR-6086
	hsa-miR-6088
	hsa-miR-6090
	hsa-miR-6124
	hsa-miR-6125
	hsa-miR-6127
	hsa-miR-378j
	hsa-miR-6130
	hsa-miR-6131
	hsa-miR-6133
	hsa-miR-6165
	hsa-miR-6501-5p
	hsa-miR-6502-5p
	hsa-miR-6505-5p
	hsa-miR-6505-3p
	hsa-miR-6507-5p
	hsa-miR-6507-3p
	hsa-miR-6508-3p
	hsa-miR-6509-5p
	hsa-miR-6509-3p
	hsa-miR-6510-5p
	hsa-miR-6511a-5p
	hsa-miR-6511a-3p
	hsa-miR-6512-5p
	hsa-miR-6512-3p
	hsa-miR-6513-5p
	hsa-miR-6513-3p
	hsa-miR-6514-5p
	hsa-miR-6515-3p
	hsa-miR-6716-3p
	hsa-miR-6717-5p
	hsa-miR-6718-5p
	hsa-miR-6720-5p
	hsa-miR-6722-3p
	hsa-miR-892c-5p
	hsa-miR-6726-5p
	hsa-miR-6726-3p
	hsa-miR-6728-5p
	hsa-miR-6729-3p
	hsa-miR-6730-5p
	hsa-miR-6730-3p
	hsa-miR-6731-3p
	hsa-miR-6732-5p
	hsa-miR-6732-3p
	hsa-miR-6733-5p
	hsa-miR-6734-3p
	hsa-miR-6735-5p
	hsa-miR-6735-3p
	hsa-miR-6736-3p
	hsa-miR-6737-3p
	hsa-miR-6738-5p
	hsa-miR-6739-5p
	hsa-miR-6740-3p
	hsa-miR-6741-3p
	hsa-miR-6743-3p
	hsa-miR-6746-5p
	hsa-miR-6747-3p
	hsa-miR-6748-3p
	hsa-miR-6749-3p
	hsa-miR-6750-5p
	hsa-miR-6750-3p
	hsa-miR-6751-3p
	hsa-miR-6752-5p
	hsa-miR-6752-3p
	hsa-miR-6753-5p
	hsa-miR-6753-3p
	hsa-miR-6754-5p
	hsa-miR-6757-3p
	hsa-miR-6758-5p
	hsa-miR-6759-3p
	hsa-miR-6760-5p
	hsa-miR-6760-3p
	hsa-miR-6762-5p
	hsa-miR-6763-5p
	hsa-miR-6765-5p
	hsa-miR-6765-3p
	hsa-miR-6767-3p
	hsa-miR-6768-3p
	hsa-miR-6769a-3p
	hsa-miR-6771-5p
	hsa-miR-6771-3p
	hsa-miR-6772-3p
	hsa-miR-6773-3p
	hsa-miR-6774-3p
	hsa-miR-6776-3p
	hsa-miR-6777-3p
	hsa-miR-6778-3p
	hsa-miR-6779-3p
	hsa-miR-6780a-5p
	hsa-miR-6780a-3p
	hsa-miR-6781-3p
	hsa-miR-6782-3p
	hsa-miR-6783-3p
	hsa-miR-6784-5p
	hsa-miR-6784-3p
	hsa-miR-6785-3p
	hsa-miR-6786-3p
	hsa-miR-6787-5p
	hsa-miR-6787-3p
	hsa-miR-6788-5p
	hsa-miR-6788-3p
	hsa-miR-6790-3p
	hsa-miR-6791-5p
	hsa-miR-6792-5p
	hsa-miR-6792-3p
	hsa-miR-6793-3p
	hsa-miR-6794-5p
	hsa-miR-6794-3p
	hsa-miR-6795-3p
	hsa-miR-6796-5p
	hsa-miR-6796-3p
	hsa-miR-6797-3p
	hsa-miR-6798-5p
	hsa-miR-6798-3p
	hsa-miR-6799-5p
	hsa-miR-6799-3p
	hsa-miR-6801-3p
	hsa-miR-6803-3p
	hsa-miR-6804-5p
	hsa-miR-6805-5p
	hsa-miR-6805-3p
	hsa-miR-6806-5p
	hsa-miR-6807-5p
	hsa-miR-6807-3p
	hsa-miR-6809-5p
	hsa-miR-6809-3p
	hsa-miR-6810-5p
	hsa-miR-6810-3p
	hsa-miR-6812-3p
	hsa-miR-6813-3p
	hsa-miR-6814-5p
	hsa-miR-6814-3p
	hsa-miR-6815-5p
	hsa-miR-6815-3p
	hsa-miR-6817-5p
	hsa-miR-6819-5p
	hsa-miR-6819-3p
	hsa-miR-6820-5p
	hsa-miR-6822-3p
	hsa-miR-6823-3p
	hsa-miR-6824-5p
	hsa-miR-6824-3p
	hsa-miR-6826-5p
	hsa-miR-6826-3p
	hsa-miR-6827-5p
	hsa-miR-6827-3p
	hsa-miR-6830-5p
	hsa-miR-6830-3p
	hsa-miR-6831-5p
	hsa-miR-6832-3p
	hsa-miR-6833-5p
	hsa-miR-6834-3p
	hsa-miR-6780b-5p
	hsa-miR-6780b-3p
	hsa-miR-6838-5p
	hsa-miR-6838-3p
	hsa-miR-6839-5p
	hsa-miR-6840-5p
	hsa-miR-6841-3p
	hsa-miR-6845-3p
	hsa-miR-6846-5p
	hsa-miR-6846-3p
	hsa-miR-6847-5p
	hsa-miR-6848-5p
	hsa-miR-6848-3p
	hsa-miR-6851-5p
	hsa-miR-6851-3p
	hsa-miR-6855-3p
	hsa-miR-6856-3p
	hsa-miR-6857-5p
	hsa-miR-6858-5p
	hsa-miR-6769b-3p
	hsa-miR-6861-3p
	hsa-miR-6862-5p
	hsa-miR-6862-3p
	hsa-miR-6865-5p
	hsa-miR-6865-3p
	hsa-miR-6866-3p
	hsa-miR-6867-3p
	hsa-miR-6870-5p
	hsa-miR-6871-5p
	hsa-miR-6872-5p
	hsa-miR-6872-3p
	hsa-miR-6873-5p
	hsa-miR-6873-3p
	hsa-miR-6875-5p
	hsa-miR-6875-3p
	hsa-miR-6876-5p
	hsa-miR-6876-3p
	hsa-miR-6877-3p
	hsa-miR-6878-5p
	hsa-miR-6878-3p
	hsa-miR-6879-5p
	hsa-miR-6879-3p
	hsa-miR-6880-3p
	hsa-miR-6881-3p
	hsa-miR-6882-5p
	hsa-miR-6883-3p
	hsa-miR-6884-3p
	hsa-miR-6885-3p
	hsa-miR-6886-3p
	hsa-miR-6887-3p
	hsa-miR-6888-5p
	hsa-miR-6889-3p
	hsa-miR-6890-5p
	hsa-miR-6891-5p
	hsa-miR-6891-3p
	hsa-miR-6892-3p
	hsa-miR-6893-5p
	hsa-miR-6893-3p
	hsa-miR-6894-3p
	hsa-miR-7106-5p
	hsa-miR-7106-3p
	hsa-miR-7107-5p
	hsa-miR-7108-3p
	hsa-miR-7109-3p
	hsa-miR-7111-5p
	hsa-miR-7111-3p
	hsa-miR-7112-3p
	hsa-miR-7113-3p
	hsa-miR-7150
	hsa-miR-7151-3p
	hsa-miR-7152-5p
	hsa-miR-7152-3p
	hsa-miR-7155-3p
	hsa-miR-7156-5p
	hsa-miR-7160-3p
	hsa-miR-7162-5p
	hsa-miR-7162-3p
	hsa-miR-7515
	hsa-miR-7703
	hsa-miR-7843-5p
	hsa-miR-4433b-5p
	hsa-miR-4433b-3p
	hsa-miR-1273h-5p
	hsa-miR-1273h-3p
	hsa-miR-6516-3p
	hsa-miR-7846-3p
	hsa-miR-7847-3p
	hsa-miR-7848-3p
	hsa-miR-7850-5p
	hsa-miR-7851-3p
	hsa-miR-7855-5p
	hsa-miR-7974
	hsa-miR-7975
	hsa-miR-7976
	hsa-miR-7977
	hsa-miR-8053
	hsa-miR-8054
	hsa-miR-8070
	hsa-miR-8072
	hsa-miR-8075
	hsa-miR-8079
	hsa-miR-8085
	hsa-miR-8087
	hsa-miR-9500
	hsa-miR-548bb-3p
	hsa-miR-9903
	hsa-miR-10394-5p
	hsa-miR-10396a-3p
	hsa-miR-10397-5p
	hsa-miR-10398-5p
	hsa-miR-10398-3p
	hsa-miR-10401-3p
	hsa-miR-10396b-3p
	hsa-miR-10526-3p
	hsa-miR-11181-3p
	hsa-miR-3059-5p
	hsa-miR-3059-3p
	hsa-miR-3085-3p
	hsa-miR-6529-5p
	hsa-miR-6529-3p
	hsa-miR-12118
	hsa-miR-12119
	hsa-miR-12120
	hsa-miR-12122
	hsa-miR-12125
	hsa-miR-18a-3p
	hsa-miR-24-1-5p
	hsa-miR-25-3p
	hsa-miR-30a-3p
	hsa-miR-95-3p
	hsa-miR-29b-1-5p
	hsa-miR-29b-2-5p
	hsa-miR-139-5p
	hsa-miR-181a-5p
	hsa-miR-181b-5p
	hsa-miR-181c-5p
	hsa-miR-214-5p
	hsa-miR-216a-5p
	hsa-miR-222-3p
	hsa-miR-200b-5p
	hsa-let-7g-3p
	hsa-miR-23b-5p
	hsa-miR-128-1-5p
	hsa-miR-149-5p
	hsa-miR-150-3p
	hsa-miR-185-5p
	hsa-miR-193a-5p
	hsa-miR-195-3p
	hsa-miR-128-2-5p
	hsa-miR-194-3p
	hsa-miR-106b-3p
	hsa-miR-219a-2-3p
	hsa-miR-296-3p
	hsa-miR-30e-3p
	hsa-miR-363-5p
	hsa-miR-363-3p
	hsa-miR-376a-5p
	hsa-miR-381-5p
	hsa-miR-323a-5p
	hsa-miR-331-3p
	hsa-miR-324-3p
	hsa-miR-346
	hsa-miR-425-5p
	hsa-miR-425-3p
	hsa-miR-20b-3p
	hsa-miR-487a-3p
	hsa-miR-490-5p
	hsa-miR-490-3p
	hsa-miR-202-3p
	hsa-miR-193b-5p
	hsa-miR-181d-5p
	hsa-miR-515-3p
	hsa-miR-523-3p
	hsa-miR-524-3p
	hsa-miR-518e-3p
	hsa-miR-376a-2-5p
	hsa-miR-487b-3p
	hsa-miR-92b-3p
	hsa-miR-558
	hsa-miR-564
	hsa-miR-593-3p
	hsa-miR-604
	hsa-miR-605-5p
	hsa-miR-609
	hsa-miR-611
	hsa-miR-615-5p
	hsa-miR-615-3p
	hsa-miR-632
	hsa-miR-640
	hsa-miR-647
	hsa-miR-652-3p
	hsa-miR-661
	hsa-miR-653-3p
	hsa-miR-549a-5p
	hsa-miR-658
	hsa-miR-671-3p
	hsa-miR-668-5p
	hsa-miR-1468-5p
	hsa-miR-769-5p
	hsa-miR-762
	hsa-miR-764
	hsa-miR-675-5p
	hsa-miR-300
	hsa-miR-541-5p
	hsa-miR-887-3p
	hsa-miR-934
	hsa-miR-937-5p
	hsa-miR-942-5p
	hsa-miR-1178-5p
	hsa-miR-1184
	hsa-miR-1225-5p
	hsa-miR-1227-5p
	hsa-miR-1236-3p
	hsa-miR-1238-3p
	hsa-miR-1203
	hsa-miR-1205
	hsa-miR-1207-5p
	hsa-miR-1289
	hsa-miR-1294
	hsa-miR-1304-3p
	hsa-miR-1247-5p
	hsa-miR-1247-3p
	hsa-miR-1268a
	hsa-miR-1322
	hsa-miR-1471
	hsa-miR-1539
	hsa-miR-103b
	hsa-miR-1909-5p
	hsa-miR-1911-3p
	hsa-miR-1914-3p
	hsa-miR-2114-5p
	hsa-miR-2115-3p
	hsa-miR-2682-3p
	hsa-miR-378b
	hsa-miR-3135a
	hsa-miR-3136-3p
	hsa-miR-3147
	hsa-miR-3150a-3p
	hsa-miR-3155a
	hsa-miR-3177-3p
	hsa-miR-3180-5p
	hsa-miR-3185
	hsa-miR-3186-3p
	hsa-miR-3189-3p
	hsa-miR-3193
	hsa-miR-3194-3p
	hsa-miR-3195
	hsa-miR-4304
	hsa-miR-4310
	hsa-miR-4316
	hsa-miR-4318
	hsa-miR-4317
	hsa-miR-4323
	hsa-miR-4260
	hsa-miR-4254
	hsa-miR-4326
	hsa-miR-4271
	hsa-miR-4281
	hsa-miR-4284
	hsa-miR-3605-5p
	hsa-miR-3621
	hsa-miR-3652
	hsa-miR-3655
	hsa-miR-3660
	hsa-miR-3663-3p
	hsa-miR-3670
	hsa-miR-3675-5p
	hsa-miR-3677-5p
	hsa-miR-3677-3p
	hsa-miR-3679-5p
	hsa-miR-3692-3p
	hsa-miR-3689b-3p
	hsa-miR-3915
	hsa-miR-3918
	hsa-miR-3150b-3p
	hsa-miR-3944-3p
	hsa-miR-642b-5p
	hsa-miR-642b-3p
	hsa-miR-550b-3p
	hsa-miR-1268b
	hsa-miR-4425
	hsa-miR-4436a
	hsa-miR-4439
	hsa-miR-4441
	hsa-miR-4447
	hsa-miR-4448
	hsa-miR-4449
	hsa-miR-4450
	hsa-miR-4453
	hsa-miR-4468
	hsa-miR-4469
	hsa-miR-4472
	hsa-miR-3689c
	hsa-miR-4479
	hsa-miR-3155b
	hsa-miR-4481
	hsa-miR-4497
	hsa-miR-2392
	hsa-miR-4512
	hsa-miR-4525
	hsa-miR-4527
	hsa-miR-4535
	hsa-miR-3975
	hsa-miR-3978
	hsa-miR-4634
	hsa-miR-4639-3p
	hsa-miR-4640-3p
	hsa-miR-4651
	hsa-miR-4660
	hsa-miR-4665-5p
	hsa-miR-4669
	hsa-miR-4676-5p
	hsa-miR-4682
	hsa-miR-4685-5p
	hsa-miR-1343-3p
	hsa-miR-4689
	hsa-miR-4726-5p
	hsa-miR-4728-3p
	hsa-miR-4729
	hsa-miR-4743-5p
	hsa-miR-4746-5p
	hsa-miR-4747-5p
	hsa-miR-4750-5p
	hsa-miR-4754
	hsa-miR-4758-5p
	hsa-miR-4768-5p
	hsa-miR-4783-5p
	hsa-miR-4783-3p
	hsa-miR-2467-5p
	hsa-miR-4787-3p
	hsa-miR-4793-5p
	hsa-miR-5003-3p
	hsa-miR-5187-3p
	hsa-miR-5192
	hsa-miR-5193
	hsa-miR-5197-5p
	hsa-miR-5587-5p
	hsa-miR-5587-3p
	hsa-miR-5588-5p
	hsa-miR-5589-5p
	hsa-miR-5589-3p
	hsa-miR-5698
	hsa-miR-5739
	hsa-miR-6068
	hsa-miR-6077
	hsa-miR-6078
	hsa-miR-6134
	hsa-miR-6503-3p
	hsa-miR-6506-5p
	hsa-miR-6511b-5p
	hsa-miR-6511b-3p
	hsa-miR-6727-3p
	hsa-miR-6728-3p
	hsa-miR-6734-5p
	hsa-miR-6741-5p
	hsa-miR-6745
	hsa-miR-6747-5p
	hsa-miR-6748-5p
	hsa-miR-6751-5p
	hsa-miR-6756-3p
	hsa-miR-6757-5p
	hsa-miR-6758-3p
	hsa-miR-6763-3p
	hsa-miR-6770-3p
	hsa-miR-6772-5p
	hsa-miR-6777-5p
	hsa-miR-6778-5p
	hsa-miR-6779-5p
	hsa-miR-6785-5p
	hsa-miR-6789-5p
	hsa-miR-6790-5p
	hsa-miR-6795-5p
	hsa-miR-6797-5p
	hsa-miR-6802-3p
	hsa-miR-6820-3p
	hsa-miR-6823-5p
	hsa-miR-6825-5p
	hsa-miR-6825-3p
	hsa-miR-6829-5p
	hsa-miR-6833-3p
	hsa-miR-6836-3p
	hsa-miR-6842-5p
	hsa-miR-6847-3p
	hsa-miR-6849-5p
	hsa-miR-6853-5p
	hsa-miR-6853-3p
	hsa-miR-6854-3p
	hsa-miR-6855-5p
	hsa-miR-6858-3p
	hsa-miR-6769b-5p
	hsa-miR-6864-3p
	hsa-miR-6868-3p
	hsa-miR-6870-3p
	hsa-miR-6871-3p
	hsa-miR-6877-5p
	hsa-miR-6880-5p
	hsa-miR-6882-3p
	hsa-miR-6883-5p
	hsa-miR-6886-5p
	hsa-miR-6889-5p
	hsa-miR-6894-5p
	hsa-miR-6895-3p
	hsa-miR-7109-5p
	hsa-miR-7110-3p
	hsa-miR-7114-5p
	hsa-miR-7114-3p
	hsa-miR-7154-3p
	hsa-miR-7155-5p
	hsa-miR-7158-5p
	hsa-miR-7161-5p
	hsa-miR-7160-5p
	hsa-miR-7704
	hsa-miR-7845-5p
	hsa-miR-7849-3p
	hsa-miR-7854-3p
	hsa-miR-7978
	hsa-miR-8052
	hsa-miR-8060
	hsa-miR-8071
	hsa-miR-8078
	hsa-miR-8088
	hsa-miR-10226
	hsa-miR-10401-5p
	hsa-miR-10523-5p
	hsa-miR-10524-5p
	hsa-miR-9851-5p
	hsa-miR-12114
	hsa-miR-12116
	hsa-miR-12127
	hsa-miR-200a-5p
	hsa-miR-302c-5p
	hsa-miR-431-5p
	hsa-miR-146b-5p
	hsa-miR-146b-3p
	hsa-miR-584-5p
	hsa-miR-660-3p
	hsa-miR-1250-5p
	hsa-miR-1265
	hsa-miR-1269a
	hsa-miR-1910-3p
	hsa-miR-1915-3p
	hsa-miR-3192-5p
	hsa-miR-4259
	hsa-miR-3940-5p
	hsa-miR-4454
	hsa-miR-4463
	hsa-miR-1587
	hsa-miR-4540
	hsa-miR-4655-5p
	hsa-miR-4717-3p
	hsa-miR-4726-3p
	hsa-miR-4734
	hsa-miR-4745-3p
	hsa-miR-5090
	hsa-miR-5093
	hsa-miR-6132
	hsa-miR-6501-3p
	hsa-miR-6781-5p
	hsa-miR-6813-5p
	hsa-miR-6866-5p
	hsa-miR-6881-5p
	hsa-miR-6516-5p
	hsa-miR-8077
	hsa-miR-8089
	hsa-miR-210-3p
	hsa-miR-382-5p
	hsa-miR-431-3p
	hsa-miR-532-5p
	hsa-miR-575
	hsa-miR-610
	hsa-miR-1237-5p
	hsa-miR-3131
	hsa-miR-3141
	hsa-miR-3189-5p
	hsa-miR-3692-5p
	hsa-miR-3925-5p
	hsa-miR-3937
	hsa-miR-4429
	hsa-miR-4466
	hsa-miR-4538
	hsa-miR-4638-5p
	hsa-miR-4652-5p
	hsa-miR-4763-3p
	hsa-miR-4784
	hsa-miR-5091
	hsa-miR-5787
	hsa-miR-6515-5p
	hsa-miR-6740-5p
	hsa-miR-6743-5p
	hsa-miR-6749-5p
	hsa-miR-6769a-5p
	hsa-miR-6803-5p
	hsa-miR-6812-5p
	hsa-miR-6845-5p
	hsa-miR-6856-5p
	hsa-miR-6860
	hsa-miR-6861-5p
	hsa-miR-8082
	hsa-miR-10392-5p
	hsa-miR-10394-3p
	hsa-miR-3085-5p
	hsa-miR-12121
	hsa-miR-12128
	hsa-let-7d-3p
	hsa-miR-18a-5p
	hsa-miR-19b-2-5p
	hsa-miR-27a-3p
	hsa-miR-101-5p
	hsa-miR-106a-3p
	hsa-miR-16-2-3p
	hsa-miR-30d-5p
	hsa-miR-183-3p
	hsa-miR-122-5p
	hsa-miR-145-5p
	hsa-miR-145-3p
	hsa-miR-152-5p
	hsa-miR-9-5p
	hsa-miR-150-5p
	hsa-miR-200c-3p
	hsa-miR-302d-5p
	hsa-miR-370-5p
	hsa-miR-372-3p
	hsa-miR-148b-5p
	hsa-miR-148b-3p
	hsa-miR-331-5p
	hsa-miR-423-3p
	hsa-miR-18b-5p
	hsa-miR-486-3p
	hsa-miR-181d-3p
	hsa-miR-520e-5p
	hsa-miR-526b-3p
	hsa-miR-520b-3p
	hsa-miR-526a-3p
	hsa-miR-524-5p
	hsa-miR-516b-5p
	hsa-miR-518a-5p
	hsa-miR-520h
	hsa-miR-527
	hsa-miR-587
	hsa-miR-589-3p
	hsa-miR-590-5p
	hsa-miR-631
	hsa-miR-635
	hsa-miR-650
	hsa-miR-655-5p
	hsa-miR-659-3p
	hsa-miR-421
	hsa-miR-1301-5p
	hsa-miR-449c-3p
	hsa-miR-1226-3p
	hsa-miR-548j-5p
	hsa-miR-1245a
	hsa-miR-1248
	hsa-miR-1284
	hsa-miR-1197
	hsa-miR-1912-5p
	hsa-miR-548q
	hsa-miR-718
	hsa-miR-3128
	hsa-miR-466
	hsa-miR-3169
	hsa-miR-3173-5p
	hsa-miR-1193
	hsa-miR-3180-3p
	hsa-miR-3190-5p
	hsa-miR-3191-3p
	hsa-miR-3192-3p
	hsa-miR-4294
	hsa-miR-4308
	hsa-miR-4258
	hsa-miR-4325
	hsa-miR-4291
	hsa-miR-4329
	hsa-miR-3612
	hsa-miR-3622b-3p
	hsa-miR-3662
	hsa-miR-3681-3p
	hsa-miR-3927-5p
	hsa-miR-3928-5p
	hsa-miR-3939
	hsa-miR-4418
	hsa-miR-4445-5p
	hsa-miR-4465
	hsa-miR-4491
	hsa-miR-4496
	hsa-miR-4524a-3p
	hsa-miR-3977
	hsa-miR-4635
	hsa-miR-4638-3p
	hsa-miR-4659a-5p
	hsa-miR-4659a-3p
	hsa-miR-4668-5p
	hsa-miR-219b-5p
	hsa-miR-4684-3p
	hsa-miR-4691-5p
	hsa-miR-4693-5p
	hsa-miR-4699-5p
	hsa-miR-4706
	hsa-miR-4709-5p
	hsa-miR-4713-5p
	hsa-miR-4724-5p
	hsa-miR-4755-3p
	hsa-miR-4762-5p
	hsa-miR-4764-3p
	hsa-miR-4774-3p
	hsa-miR-4777-3p
	hsa-miR-4787-5p
	hsa-miR-4796-3p
	hsa-miR-4797-3p
	hsa-miR-4666b
	hsa-miR-5695
	hsa-miR-5703
	hsa-miR-5706
	hsa-miR-6070
	hsa-miR-6503-5p
	hsa-miR-6721-5p
	hsa-miR-6738-3p
	hsa-miR-6759-5p
	hsa-miR-6761-5p
	hsa-miR-6767-5p
	hsa-miR-6768-5p
	hsa-miR-6804-3p
	hsa-miR-6806-3p
	hsa-miR-6832-5p
	hsa-miR-6835-3p
	hsa-miR-6850-3p
	hsa-miR-6852-5p
	hsa-miR-6857-3p
	hsa-miR-6874-5p
	hsa-miR-6887-5p
	hsa-miR-6890-3p
	hsa-miR-7843-3p
	hsa-miR-8056
	hsa-miR-8086
	hsa-miR-9902
	hsa-miR-9985
	hsa-miR-1843
	hsa-miR-10527-5p
	hsa-miR-12131
	hsa-miR-12136
	hsa-miR-16-1-3p
	hsa-miR-26b-3p
	hsa-miR-28-3p
	hsa-miR-93-5p
	hsa-miR-96-3p
	hsa-miR-105-5p
	hsa-miR-34a-3p
	hsa-miR-181a-2-3p
	hsa-miR-182-5p
	hsa-miR-182-3p
	hsa-miR-183-5p
	hsa-miR-212-3p
	hsa-miR-214-3p
	hsa-miR-216a-3p
	hsa-miR-221-3p
	hsa-miR-224-5p
	hsa-miR-200b-3p
	hsa-let-7g-5p
	hsa-miR-15b-3p
	hsa-miR-27b-5p
	hsa-miR-133a-3p
	hsa-miR-135a-2-3p
	hsa-miR-137-5p
	hsa-miR-141-5p
	hsa-miR-153-3p
	hsa-miR-191-3p
	hsa-miR-186-5p
	hsa-miR-193a-3p
	hsa-miR-181b-2-3p
	hsa-miR-29c-5p
	hsa-miR-99b-5p
	hsa-miR-361-3p
	hsa-miR-302b-5p
	hsa-miR-370-3p
	hsa-miR-377-5p
	hsa-miR-377-3p
	hsa-miR-378a-5p
	hsa-miR-381-3p
	hsa-miR-382-3p
	hsa-miR-340-3p
	hsa-miR-330-5p
	hsa-miR-342-3p
	hsa-miR-337-5p
	hsa-miR-133b
	hsa-miR-329-3p
	hsa-miR-376b-3p
	hsa-miR-489-3p
	hsa-miR-495-5p
	hsa-miR-496
	hsa-miR-497-5p
	hsa-miR-512-5p
	hsa-miR-498-5p
	hsa-miR-519d-5p
	hsa-miR-516b-3p
	hsa-miR-518a-3p
	hsa-miR-518d-3p
	hsa-miR-516a-3p
	hsa-miR-505-3p
	hsa-miR-513a-5p
	hsa-miR-508-3p
	hsa-miR-455-5p
	hsa-miR-539-5p
	hsa-miR-551a
	hsa-miR-552-3p
	hsa-miR-567
	hsa-miR-582-3p
	hsa-miR-585-5p
	hsa-miR-548b-5p
	hsa-miR-548b-3p
	hsa-miR-589-5p
	hsa-miR-596
	hsa-miR-600
	hsa-miR-614
	hsa-miR-616-3p
	hsa-miR-619-3p
	hsa-miR-625-5p
	hsa-miR-648
	hsa-miR-654-3p
	hsa-miR-657
	hsa-miR-1264
	hsa-miR-767-5p
	hsa-miR-1301-3p
	hsa-miR-1283
	hsa-miR-1298-5p
	hsa-miR-1298-3p
	hsa-miR-298
	hsa-miR-450b-3p
	hsa-miR-874-5p
	hsa-miR-890
	hsa-miR-888-3p
	hsa-miR-889-5p
	hsa-miR-885-5p
	hsa-miR-543
	hsa-miR-935
	hsa-miR-937-3p
	hsa-miR-940
	hsa-miR-942-3p
	hsa-miR-943
	hsa-miR-1179
	hsa-miR-1228-5p
	hsa-miR-1233-3p
	hsa-miR-548e-5p
	hsa-miR-1285-5p
	hsa-miR-1291
	hsa-miR-1244
	hsa-miR-1260a
	hsa-miR-548g-5p
	hsa-miR-1277-3p
	hsa-miR-1292-3p
	hsa-miR-513b-5p
	hsa-miR-1909-3p
	hsa-miR-1912-3p
	hsa-miR-2276-5p
	hsa-miR-2276-3p
	hsa-miR-2277-3p
	hsa-miR-2681-5p
	hsa-miR-3117-3p
	hsa-miR-3130-5p
	hsa-miR-3133
	hsa-miR-3137
	hsa-miR-3150a-5p
	hsa-miR-3152-5p
	hsa-miR-3074-3p
	hsa-miR-3158-5p
	hsa-miR-3158-3p
	hsa-miR-3159
	hsa-miR-3163
	hsa-miR-1260b
	hsa-miR-3170
	hsa-miR-3184-5p
	hsa-miR-3186-5p
	hsa-miR-3191-5p
	hsa-miR-548x-5p
	hsa-miR-4293
	hsa-miR-4299
	hsa-miR-4251
	hsa-miR-4267
	hsa-miR-4268
	hsa-miR-4288
	hsa-miR-3609
	hsa-miR-3616-3p
	hsa-miR-3617-3p
	hsa-miR-3663-5p
	hsa-miR-3664-5p
	hsa-miR-3912-3p
	hsa-miR-3916
	hsa-miR-3922-3p
	hsa-miR-3926
	hsa-miR-3934-5p
	hsa-miR-3934-3p
	hsa-miR-3943
	hsa-miR-374c-5p
	hsa-miR-4421
	hsa-miR-4423-3p
	hsa-miR-4433a-3p
	hsa-miR-4451
	hsa-miR-4456
	hsa-miR-4458
	hsa-miR-4460
	hsa-miR-378h
	hsa-miR-548aj-5p
	hsa-miR-3689f
	hsa-miR-4482-3p
	hsa-miR-4488
	hsa-miR-4489
	hsa-miR-4519
	hsa-miR-4536-3p
	hsa-miR-3973
	hsa-miR-4654
	hsa-miR-4664-3p
	hsa-miR-4677-5p
	hsa-miR-4677-3p
	hsa-miR-4679
	hsa-miR-4684-5p
	hsa-miR-4686
	hsa-miR-4692
	hsa-miR-4695-3p
	hsa-miR-4701-5p
	hsa-miR-4701-3p
	hsa-miR-4703-5p
	hsa-miR-4704-3p
	hsa-miR-4710
	hsa-miR-4711-3p
	hsa-miR-4712-5p
	hsa-miR-4712-3p
	hsa-miR-4714-5p
	hsa-miR-4714-3p
	hsa-miR-4715-5p
	hsa-miR-3529-5p
	hsa-miR-4722-3p
	hsa-miR-4727-5p
	hsa-miR-4735-5p
	hsa-miR-4740-5p
	hsa-miR-4740-3p
	hsa-miR-4743-3p
	hsa-miR-4747-3p
	hsa-miR-4756-3p
	hsa-miR-4761-3p
	hsa-miR-4766-5p
	hsa-miR-4768-3p
	hsa-miR-4772-3p
	hsa-miR-4773
	hsa-miR-2467-3p
	hsa-miR-4789-3p
	hsa-miR-4797-5p
	hsa-miR-4798-3p
	hsa-miR-4999-3p
	hsa-miR-5000-5p
	hsa-miR-5000-3p
	hsa-miR-5004-5p
	hsa-miR-5011-5p
	hsa-miR-5088-5p
	hsa-miR-5088-3p
	hsa-miR-5089-5p
	hsa-miR-5189-5p
	hsa-miR-5197-3p
	hsa-miR-5100
	hsa-miR-5580-3p
	hsa-miR-5582-5p
	hsa-miR-5591-3p
	hsa-miR-5685
	hsa-miR-5699-3p
	hsa-miR-1199-5p
	hsa-miR-6071
	hsa-miR-6072
	hsa-miR-6073
	hsa-miR-6074
	hsa-miR-6076
	hsa-miR-6082
	hsa-miR-6126
	hsa-miR-6129
	hsa-miR-6499-3p
	hsa-miR-6504-5p
	hsa-miR-6504-3p
	hsa-miR-6510-3p
	hsa-miR-6514-3p
	hsa-miR-6715b-3p
	hsa-miR-6716-5p
	hsa-miR-6739-3p
	hsa-miR-6742-3p
	hsa-miR-6744-3p
	hsa-miR-6746-3p
	hsa-miR-6754-3p
	hsa-miR-6761-3p
	hsa-miR-6762-3p
	hsa-miR-6764-5p
	hsa-miR-6766-3p
	hsa-miR-6770-5p
	hsa-miR-6773-5p
	hsa-miR-6782-5p
	hsa-miR-6789-3p
	hsa-miR-6791-3p
	hsa-miR-6800-5p
	hsa-miR-6800-3p
	hsa-miR-6801-5p
	hsa-miR-6802-5p
	hsa-miR-6811-3p
	hsa-miR-6817-3p
	hsa-miR-6818-3p
	hsa-miR-6821-5p
	hsa-miR-6821-3p
	hsa-miR-6828-5p
	hsa-miR-6828-3p
	hsa-miR-6829-3p
	hsa-miR-6831-3p
	hsa-miR-6834-5p
	hsa-miR-6837-5p
	hsa-miR-6859-3p
	hsa-miR-6868-5p
	hsa-miR-6869-5p
	hsa-miR-6888-3p
	hsa-miR-6895-5p
	hsa-miR-7110-5p
	hsa-miR-7151-5p
	hsa-miR-7153-3p
	hsa-miR-7157-5p
	hsa-miR-7702
	hsa-miR-8057
	hsa-miR-8073
	hsa-miR-8081
	hsa-miR-8083
	hsa-miR-8485
	hsa-miR-9898
	hsa-miR-10392-3p
	hsa-miR-10393-5p
	hsa-miR-11181-5p
	hsa-miR-11401
	hsa-miR-12123
	hsa-miR-12124
	hsa-miR-12126
	hsa-miR-12129
	hsa-miR-12133
	hsa-miR-4470
	hsa-miR-9983-3p
	hsa-miR-376c-5p
	hsa-miR-6842-3p
	hsa-miR-5681a
	hsa-miR-6500-5p
	hsa-miR-6775-5p
	hsa-miR-6854-5p
	hsa-miR-7112-5p
	hsa-miR-11399
	hsa-miR-12117

## Sheet: Supplementary Table 2
Supplementary Table 2 Bioinformatics database predicts miRNAs that may become potential targets of lncRNA GAS5
Bioinformatics databases
ENCORI	miRcode
hsa-miR-452-5p	hsa-miR-93
hsa-miR-4676-3p	hsa-miR-132
hsa-miR-892c-3p	hsa-miR-96
hsa-miR-2682-5p	hsa-miR-135ab
hsa-miR-34b-5p	hsa-miR-137
hsa-miR-449c-5p	hsa-miR-138
hsa-miR-524-5p	hsa-miR-139-5p
hsa-miR-520d-5p	hsa-miR-144
hsa-miR-6884-5p	hsa-miR-148ab-3p
hsa-miR-485-5p	hsa-miR-153
hsa-miR-485-5p	hsa-miR-155
hsa-miR-6884-5p	hsa-miR-182
hsa-miR-1251-5p	hsa-miR-18ab
hsa-miR-31-5p	hsa-miR-196abc
hsa-miR-10a-5p	hsa-miR-200bc
hsa-miR-10b-5p	hsa-miR-205
hsa-miR-339-5p	hsa-miR-208ab
hsa-miR-499b-5p	hsa-miR-21
hsa-miR-222-3p	hsa-miR-216a
hsa-miR-221-3p	hsa-miR-216b
hsa-miR-361-5p	hsa-miR-217
hsa-miR-3145-3p	hsa-miR-221-3p
hsa-miR-1297	hsa-miR-223
hsa-miR-26b-5p	hsa-miR-23abc
hsa-miR-26a-5p	hsa-miR-24
hsa-miR-4465	hsa-miR-26ab
hsa-miR-5094	hsa-miR-29abcd
hsa-miR-374a-5p	hsa-miR-31
hsa-miR-374b-5p	hsa-miR-33a-3p
hsa-miR-498	hsa-miR-425
hsa-miR-345-3p	hsa-miR-10abc
hsa-miR-4766-5p	hsa-miR-455-5p
hsa-miR-3127-5p	hsa-miR-128
hsa-miR-144-5p	hsa-miR-490-3p
hsa-miR-664b-3p	hsa-miR-499-5p
hsa-miR-579-3p	hsa-miR-212
hsa-miR-320d	hsa-miR-212-3p
hsa-miR-4429	hsa-miR-93a
hsa-miR-320c	hsa-miR-105
hsa-miR-320a	hsa-miR-106a
hsa-miR-320b	hsa-miR-507
hsa-miR-345-5p	hsa-miR-135a-5p
hsa-miR-651-5p	hsa-miR-137ab
hsa-miR-346	hsa-miR-138ab
hsa-miR-369-3p	hsa-miR-1271
hsa-miR-660-5p	hsa-miR-152
hsa-miR-2116-3p	hsa-miR-4735-3p
hsa-miR-519e-5p	hsa-miR-429
hsa-miR-515-5p	hsa-miR-548a
hsa-miR-137	hsa-miR-205ab
hsa-miR-137	hsa-miR-208ab-3p
hsa-miR-499b-5p	hsa-miR-590-5p
hsa-miR-6787-5p	hsa-miR-216b-5p
hsa-miR-663a	hsa-miR-23b-3p
hsa-miR-1908-5p	hsa-miR-24ab
hsa-miR-744-5p	hsa-miR-222
hsa-miR-3622b-5p	hsa-miR-222ab
hsa-miR-3690	hsa-miR-1928
hsa-miR-3622b-5p	hsa-miR-24-3p
hsa-miR-485-5p	hsa-miR-1297
hsa-miR-6884-5p	hsa-miR-4465
hsa-miR-490-3p	hsa-miR-365
hsa-miR-650	hsa-miR-365-3p
hsa-miR-3612	hsa-miR-489
hsa-miR-2467-3p	hsa-miR-425-5p
hsa-miR-371a-3p	hsa-miR-10a-5p
hsa-miR-136-5p	hsa-miR-128ab
hsa-miR-31-5p	hsa-miR-291a-3p
hsa-miR-335-5p	hsa-miR-294
hsa-miR-216a-3p	hsa-miR-295
hsa-miR-3681-3p	hsa-miR-302abcde
hsa-miR-128-3p	hsa-miR-372
hsa-miR-196a-5p	hsa-miR-373
hsa-miR-196b-5p	hsa-miR-428
hsa-miR-876-5p	hsa-miR-519a
hsa-miR-3167	hsa-miR-520be
hsa-miR-452-5p	hsa-miR-520acd-3p
hsa-miR-892c-3p	hsa-miR-1378
hsa-miR-4676-3p	hsa-miR-1420ac
hsa-miR-136-5p
hsa-miR-873-5p
hsa-miR-452-5p
hsa-miR-4676-3p
hsa-miR-892c-3p
hsa-miR-4640-3p
hsa-miR-548o-3p
hsa-miR-1323
hsa-miR-7853-5p
hsa-miR-105-5p
hsa-miR-532-5p
hsa-miR-223-3p
hsa-miR-205-5p
hsa-miR-582-5p
hsa-miR-655-3p
hsa-miR-374c-5p
hsa-miR-655-3p
hsa-miR-374c-5p
hsa-miR-545-3p
hsa-miR-509-3p
hsa-miR-545-3p
hsa-miR-433-3p
hsa-miR-130a-5p
hsa-miR-23a-3p
hsa-miR-23b-3p
hsa-miR-23c
hsa-miR-664b-3p
hsa-miR-579-3p
hsa-miR-4306
hsa-miR-185-5p
hsa-miR-4644
hsa-miR-376c-3p
hsa-miR-576-5p
hsa-miR-188-5p
hsa-miR-6866-3p
hsa-miR-3121-3p
hsa-miR-135b-5p
hsa-miR-135a-5p
hsa-miR-382-3p
hsa-miR-135a-5p
hsa-miR-135b-5p
hsa-miR-4735-3p
hsa-miR-18a-5p
hsa-miR-18b-5p
hsa-miR-525-5p
hsa-miR-520a-5p
hsa-miR-217
hsa-miR-6807-3p
hsa-miR-217
hsa-miR-6807-3p
hsa-miR-29a-3p
hsa-miR-29b-3p
hsa-miR-29c-3p
hsa-miR-29a-3p
hsa-miR-29b-3p
hsa-miR-29c-3p
hsa-miR-29a-3p
hsa-miR-29c-3p
hsa-miR-29b-3p
hsa-miR-520d-5p
hsa-miR-524-5p
hsa-miR-138-5p
hsa-miR-217
hsa-miR-6807-3p
hsa-miR-6512-3p
hsa-miR-6720-5p
hsa-miR-542-3p
hsa-miR-423-3p
hsa-miR-5579-3p
hsa-miR-455-5p
hsa-miR-370-5p
hsa-miR-501-3p
hsa-miR-502-3p
hsa-miR-513a-5p
hsa-miR-144-3p
